# Supplementary material for: CO2as a hydrogen vector – transition metal diamine catalysts for selective HCOOH dehydrogenation
Source: Royal Society of Chemistry journal article supplement (doi:10.1039/c6dt04638j), 2017-01-01
Supplement: c6dt04638j1.pdf [file c6dt04638j1.pdf]

# **CO<sub>2</sub> as hydrogen vector - Transition metal diamine catalysts for selective HCOOH dehydrogenation**

## **Supporting Information**

Cornel Fink and Gabor Laurenczy

École Polytechnique Fédérale de Lausanne, EPFL SB ISIC LCOM  
CH-1015 Lausanne

E-Mail : [cornel.fink@epfl.ch](mailto:cornel.fink@epfl.ch); [gabor.laurenczy@epfl.ch](mailto:gabor.laurenczy@epfl.ch)

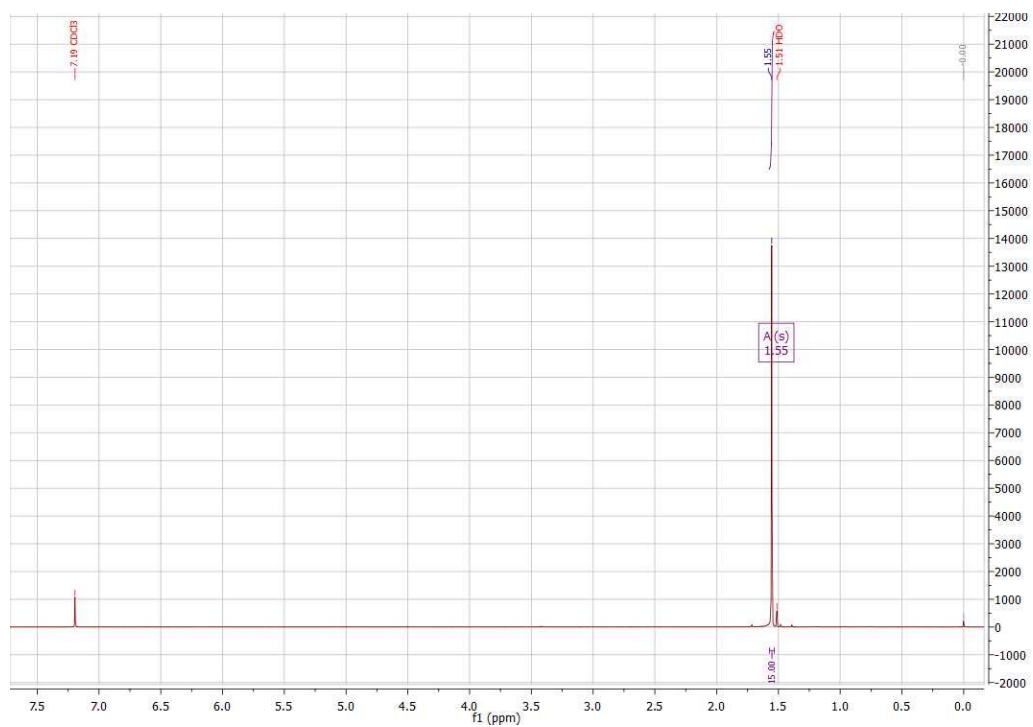

Fig. 1  $[\text{Cp}^*\text{RhCl}_2]_2$  in  $\text{CDCl}_3$   
 $^1\text{H}$  NMR (400 MHz, Chloroform-d)  $\delta$  1.55 (s, 15H)

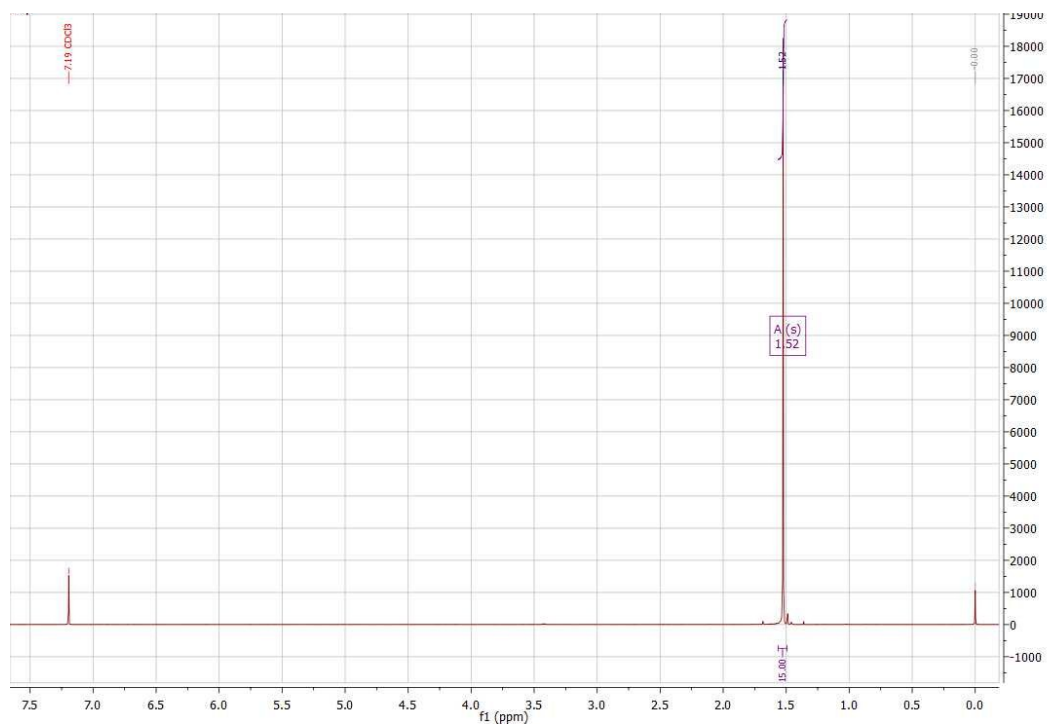

Fig. 2  $[\text{Cp}^*\text{IrCl}_2]_2$  in  $\text{CDCl}_3$   
 $^1\text{H}$  NMR (400 MHz, Chloroform-d)  $\delta$  1.52 (s, 15H).

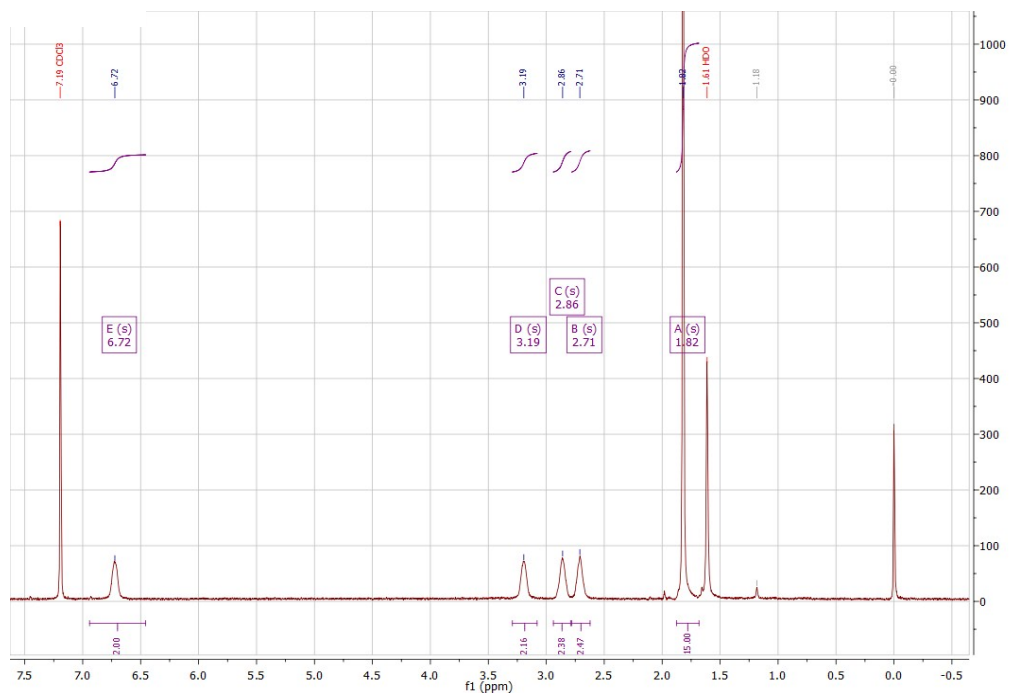

Fig. 3 Complex 1 in  $\text{CDCl}_3$   
 $^1\text{H}$  NMR (400 MHz, Chloroform-d)  $\delta$  6.72 (s, 2H), 3.19 (s, 2H), 2.86 (s, 2H), 2.71 (s, 2H), 1.82 (s, 15H).

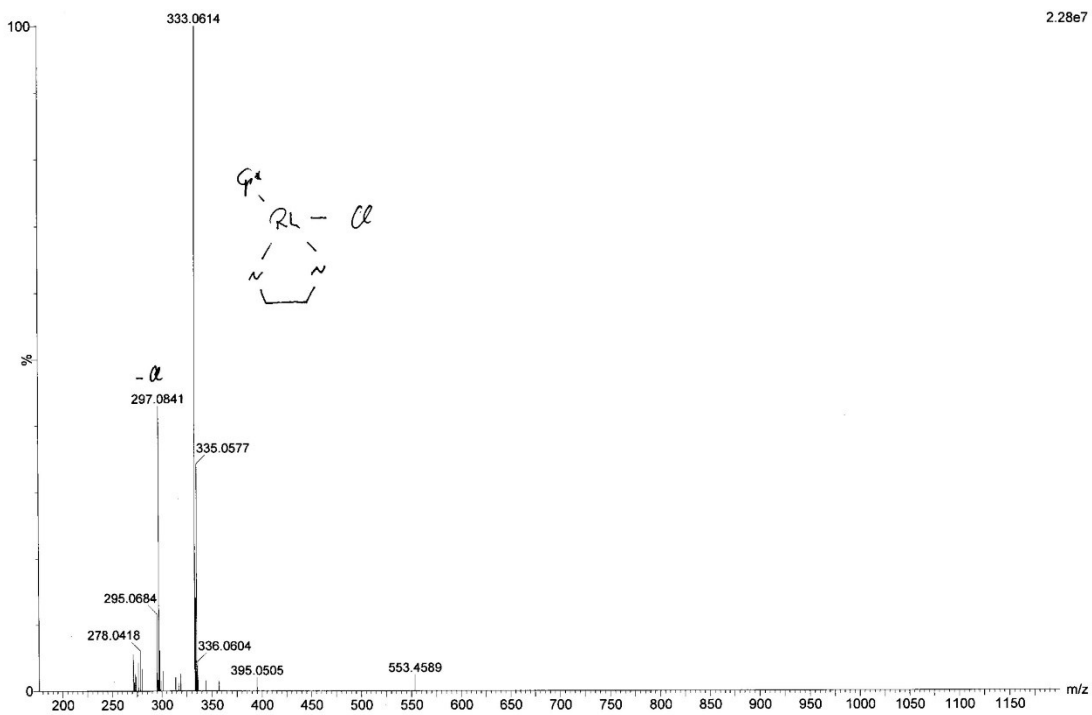

Fig. 4 Complex 2 ESI (positive mode); exact mass: 333,69

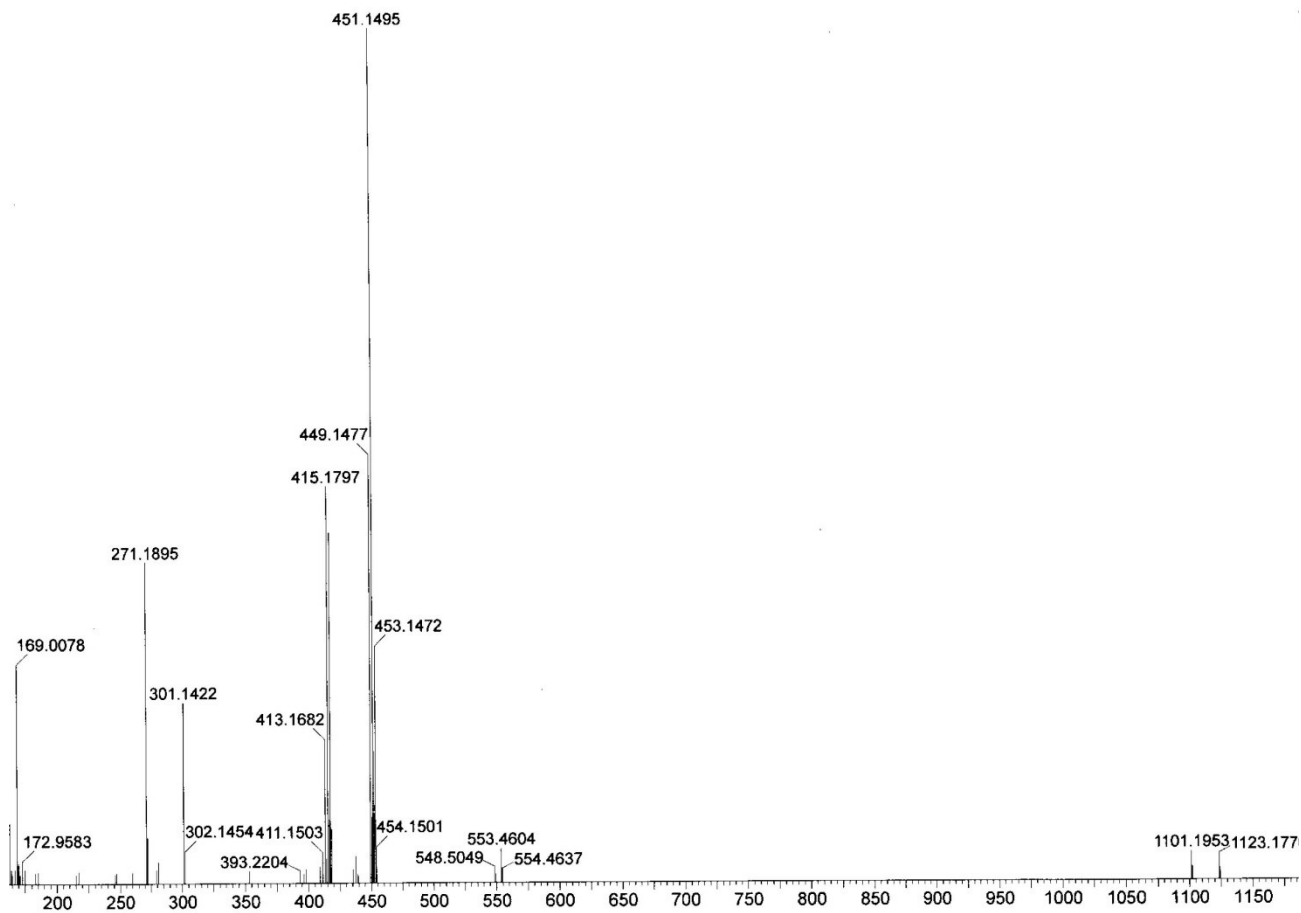

Fig. 5 Complex 3; ESI (positive mode); exact mass: 451,15

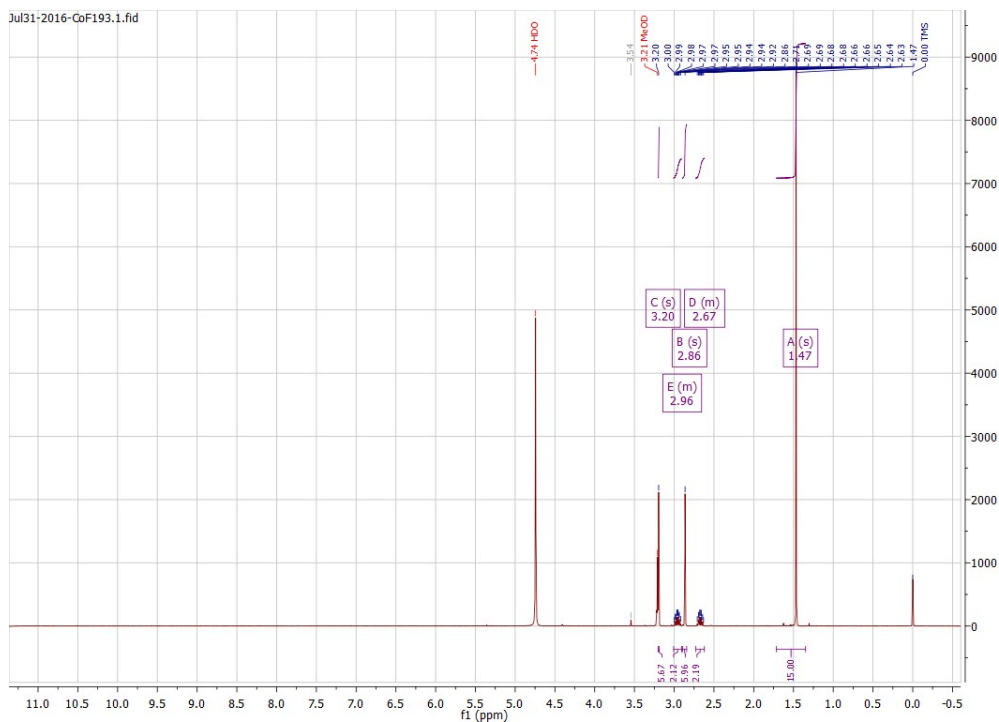

Fig. 6 Complex 4 in MeOD<sup>1</sup>

<sup>1</sup>H NMR (400 MHz, Methanol-d<sub>4</sub>) δ 3.20 (s, 6H), 3.01 – 2.91 (m, 2H), 2.86 (s, 6H), 2.73 – 2.62 (m, 2H), 1.47 (s, 15H).

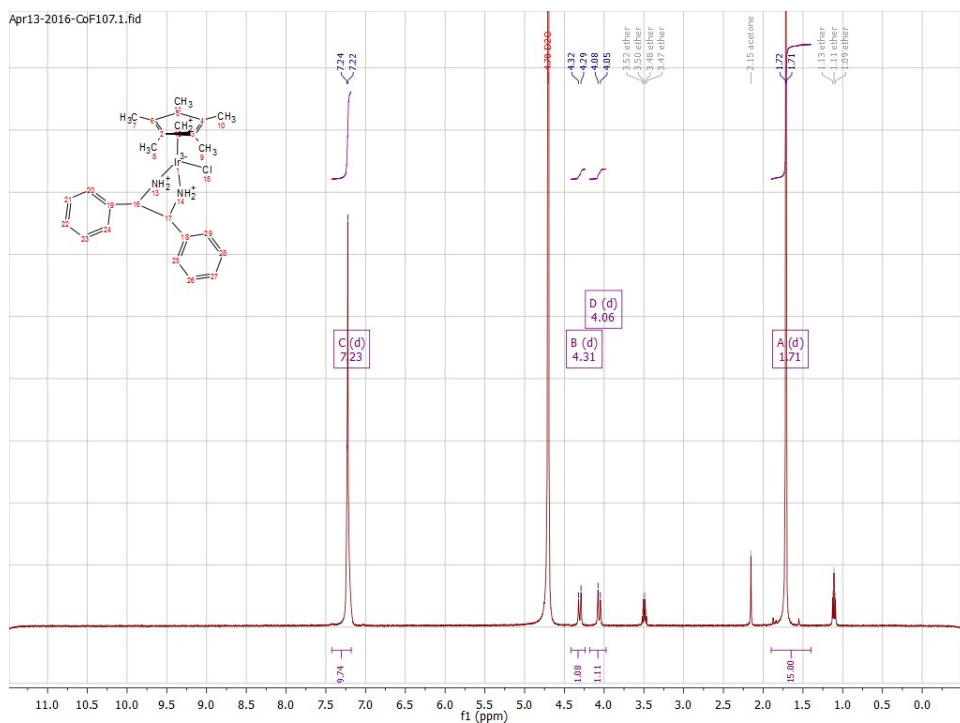

Fig. 7 Complex 5 in D<sub>2</sub>O

<sup>1</sup>H NMR (400 MHz, Deuterium Oxide) δ 7.23 (d, J = 4.7 Hz, 10H), 4.31 (d, J = 12.3 Hz, 1H), 4.06 (d, J = 12.3 Hz, 1H), 1.71 (d, J = 1.4 Hz, 15H).

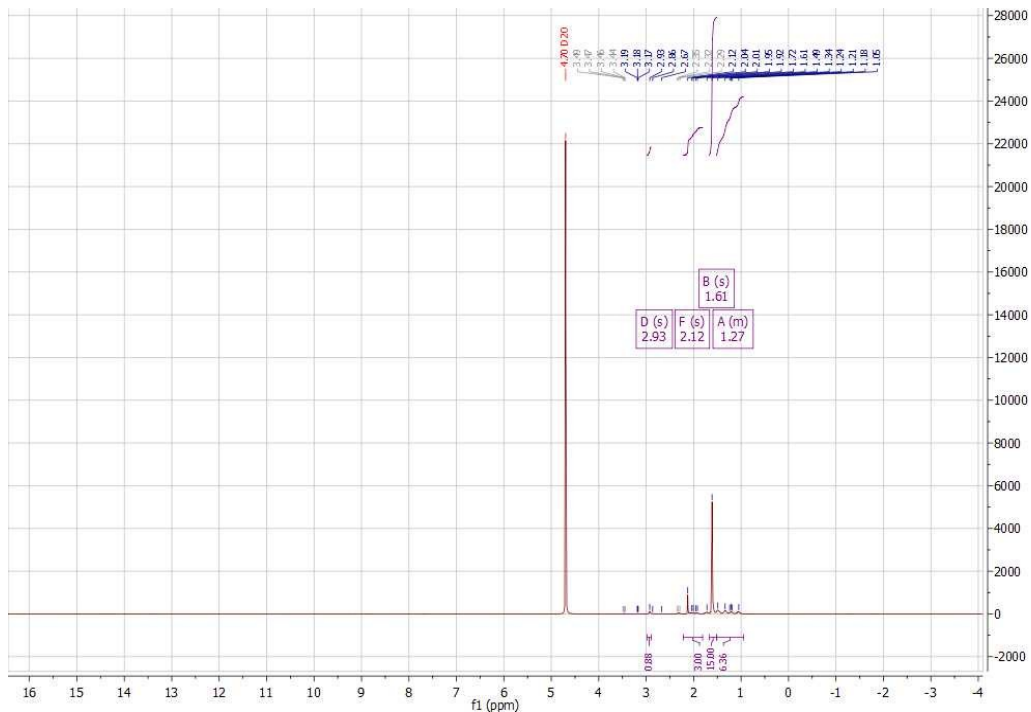

Fig. 8 Complex **6** in  $D_2O$   
 $\delta$  2.93 (s, 1H), 2.12 (s, 3H), 1.61 (s, 15H), 1.51 – 0.95 (m, 6H).

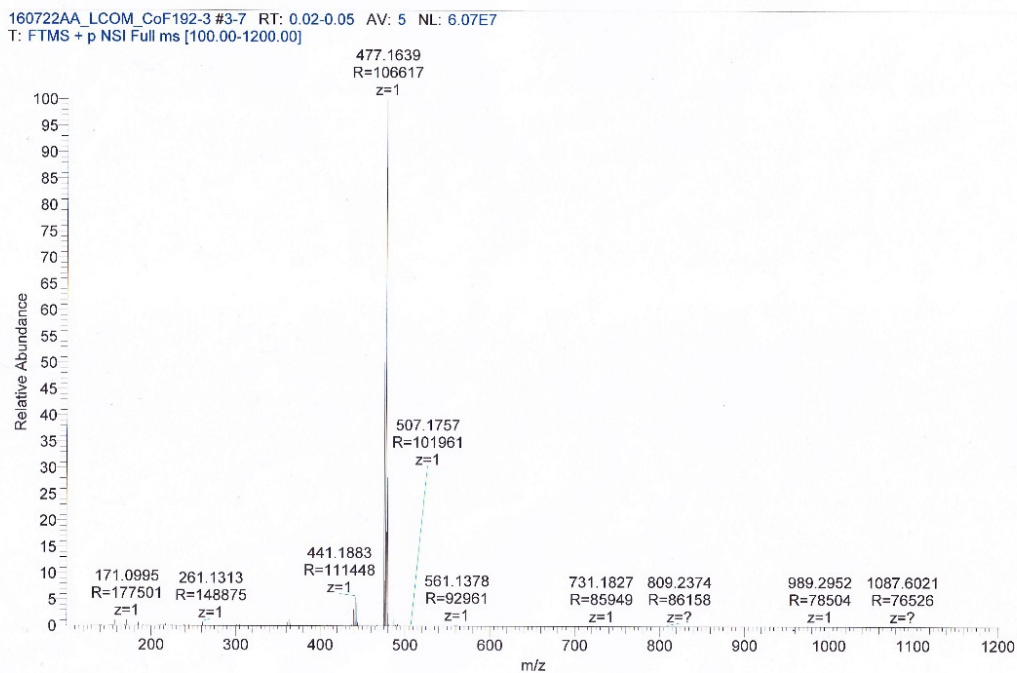

Fig. 9 Complex **6** mass spectrum; ESI (positive mode); exact mass: 477.16

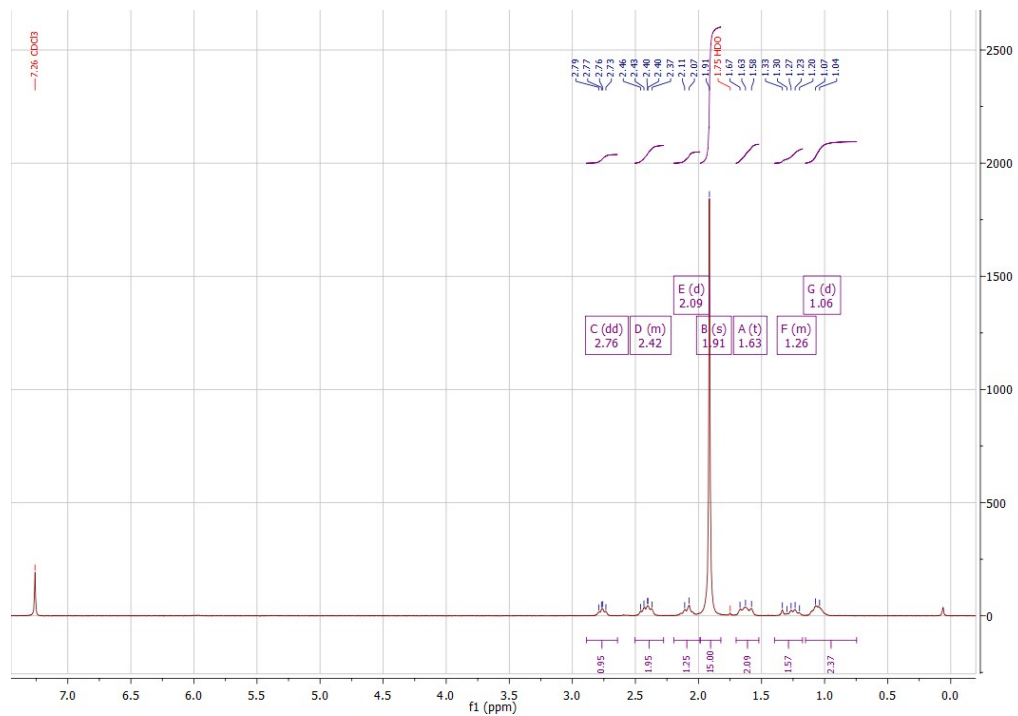

Fig. 10 Complex **7** in  $\text{CDCl}_3$

$^1\text{H}$  NMR (400 MHz, Chloroform- $d$ )  $\delta$  2.76 (dd,  $J = 13.2, 9.1$  Hz, 1H), 2.50 – 2.28 (m, 2H), 2.09 (d,  $J = 14.3$  Hz, 1H), 1.91 (s, 15H), 1.63 (t,  $J = 18.3$  Hz, 2H), 1.40 – 1.18 (m, 2H), 1.06 (d,  $J = 13.1$  Hz, 2H)

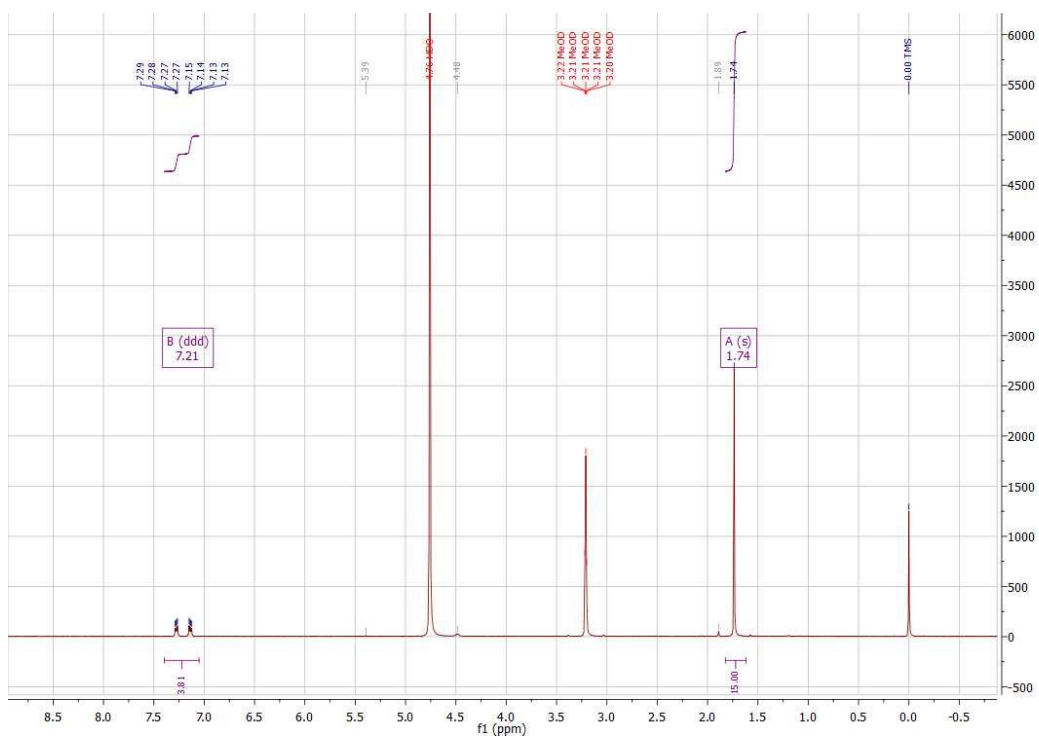

Fig. 11 Complex **8** in MeOH  
 $^1\text{H NMR}$  (400 MHz, Methanol- $d_4$ )  $\delta$  7.21 (ddd,  $J = 55.7, 6.0, 3.5$  Hz, 4H), 1.74 (s, 15H).

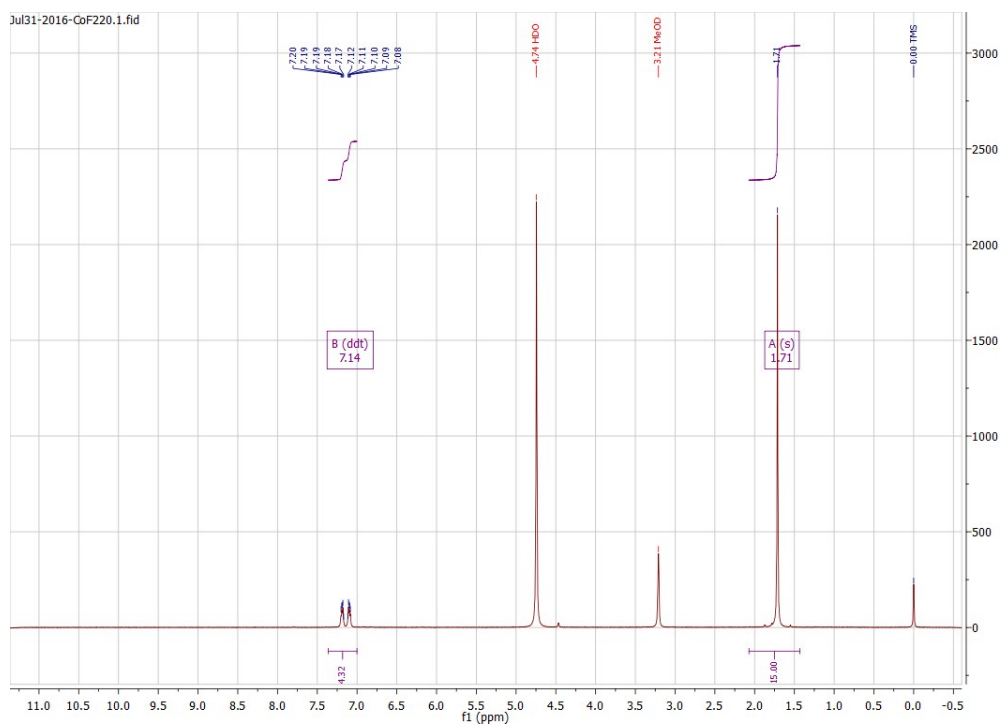

Fig. 12 Complex **9** in MeOD  
 $^1\text{H NMR}$  (400 MHz, Methanol- $d_4$ )  $\delta$  7.14 (ddd,  $J = 37.7, 6.0, 3.5$  Hz, 4H), 1.71 (s, 15H).



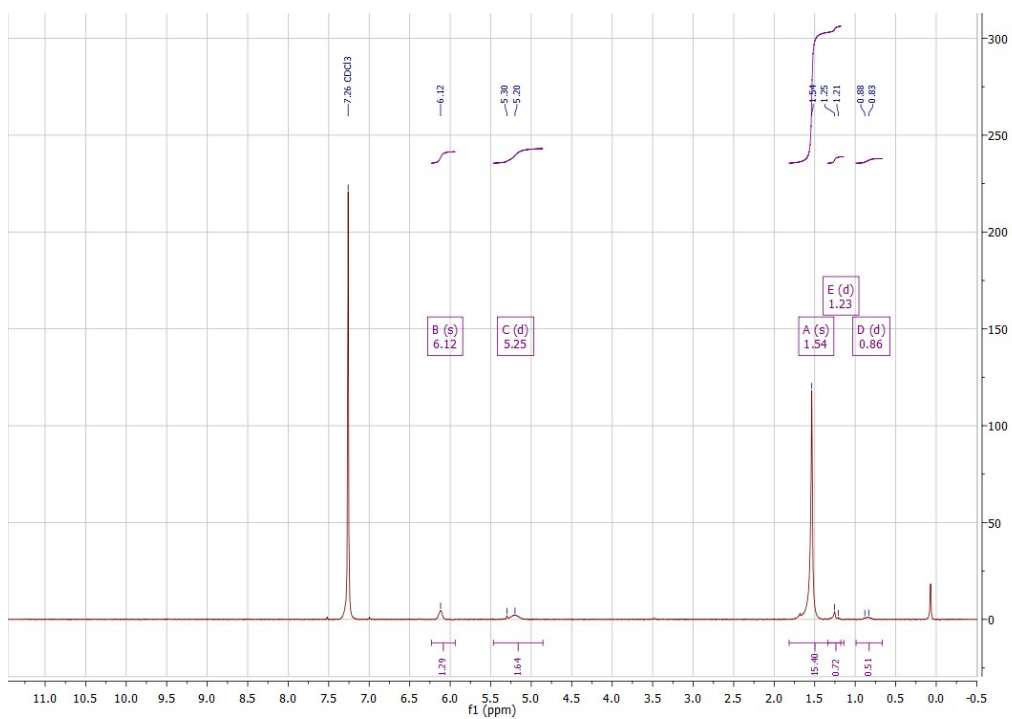

Fig. 13 Complex **10** in  $\text{CDCl}_3$

$^1\text{H}$  NMR (400 MHz, Chloroform- $d$ )  $\delta$  6.12 (s, 1H), 5.25 (d,  $J = 39.7$  Hz, 2H), 1.54 (s, 15H), 1.23 (d,  $J = 18.9$  Hz, 1H), 0.86 (d,  $J = 19.3$  Hz, 1H).

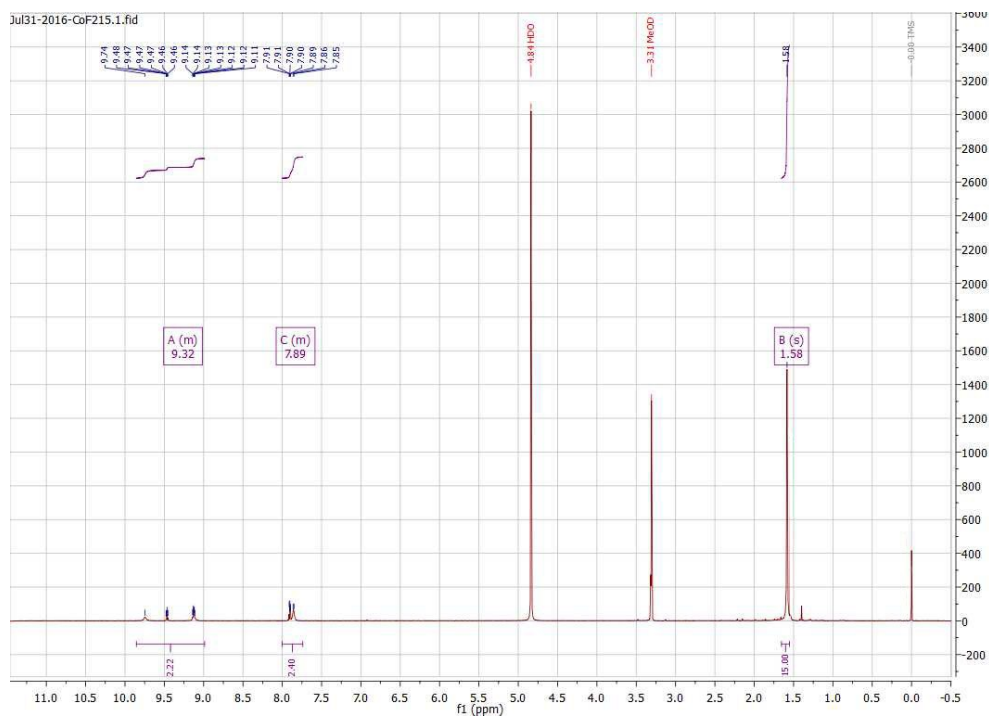

Fig. 14 Complex **11** in MeOD

$^1\text{H}$  NMR (400 MHz, Methanol- $d_4$ )  $\delta$  9.85 – 8.99 (m, 2H), 8.00 – 7.74 (m, 2H), 1.58 (s, 15H).

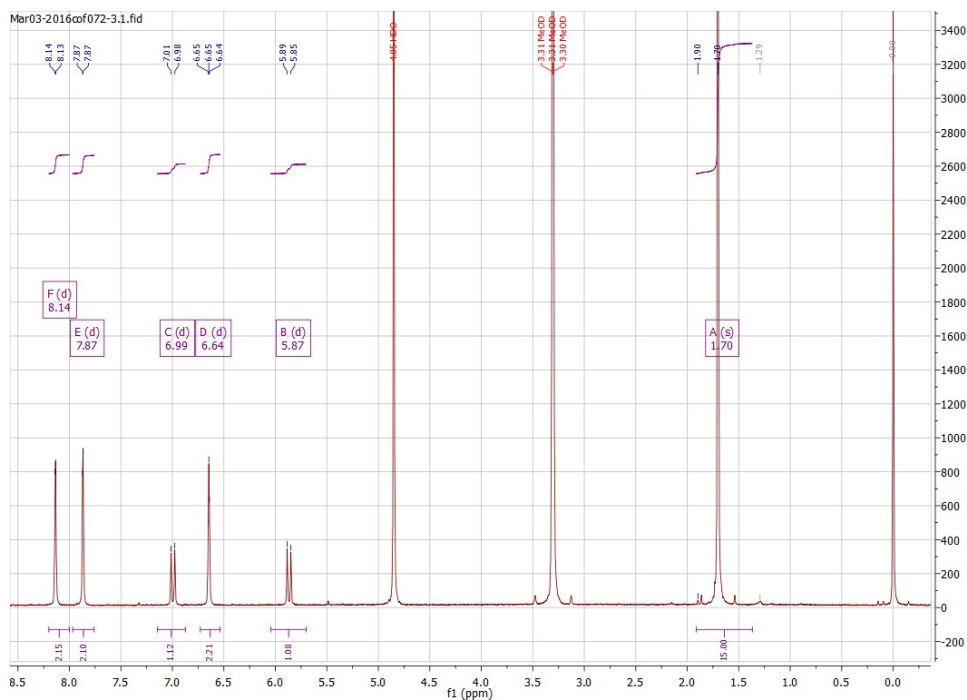

Fig. 15 Complex 12 in MeOD

$^1\text{H}$  NMR (400 MHz, Methanol- $d_4$ )  $\delta$  8.14 (d,  $J$  = 2.8 Hz, 2H), 7.87 (d,  $J$  = 2.4 Hz, 2H), 6.99 (d,  $J$  = 14.5 Hz, 1H), 6.64 (d,  $J$  = 2.6 Hz, 2H), 5.87 (d,  $J$  = 14.5 Hz, 1H), 1.70 (s, 15H).

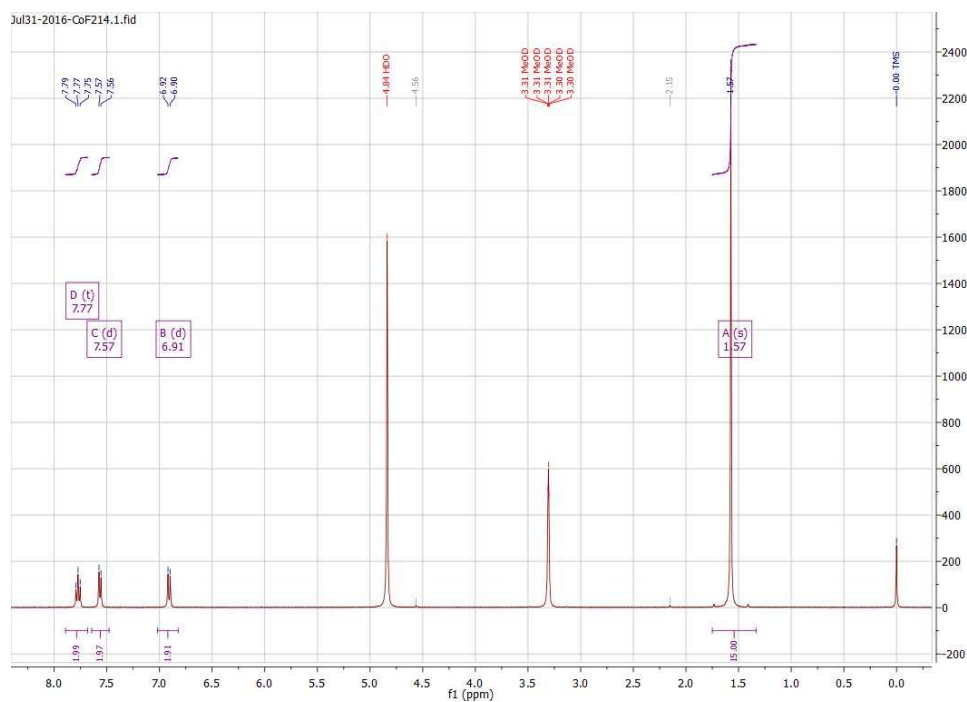

Fig. 16 Complex 13 in MeOH

$^1\text{H}$  NMR (400 MHz, Methanol- $d_4$ )  $\delta$  7.77 (t,  $J$  = 8.0 Hz, 2H), 7.57 (d,  $J$  = 7.5 Hz, 2H), 6.91 (d,  $J$  = 8.4 Hz, 2H), 1.57 (s, 15H).

Activation Energy for compound 6  $[\text{Cp}^*\text{Ir(III)(N,N')Cl}]_2\text{Cl}_2$

$\ln(\text{rate init})$        $\text{temp (}^\circ\text{C)}$

-1.24034071      50  
 -0.105027238      60  
 0.421732081      70  
 1.55520561      80  
 1.912811366      90

$\Delta H^* = + 77.94 \pm 3.16 \text{ kJ/mol}$

slope = - 9374.8  
 inter. = +27.875

| experiment\T°C     | 50     | 60    | 70    | 80     | 90   |
|--------------------|--------|-------|-------|--------|------|
| 1                  | 118,23 | 57,5  | 35,08 | 18,889 | 9,2  |
| 2                  | 123,56 | 58,93 | 34,84 | 18,45  | 8,56 |
| 3                  | 121,79 | 55,54 | 36,51 | 17,7   | 8,99 |
| mean value         | 121,19 | 57,32 | 35,48 | 18,35  | 8,92 |
| standard deviation | 2,22   | 1,39  | 0,74  | 0,49   | 0,27 |

Table 1 Time in minutes for total decomposition of FA; values in table obtained by pressure measurements (constant pressure = total conversion); verified by NMR for one sample/temperature

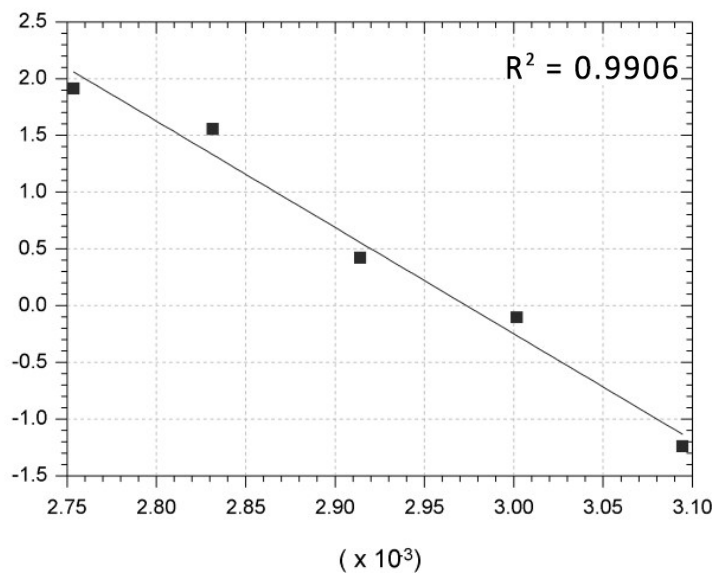

Fig. 17 Arrhenius plot; obtained from mentioned dataset above

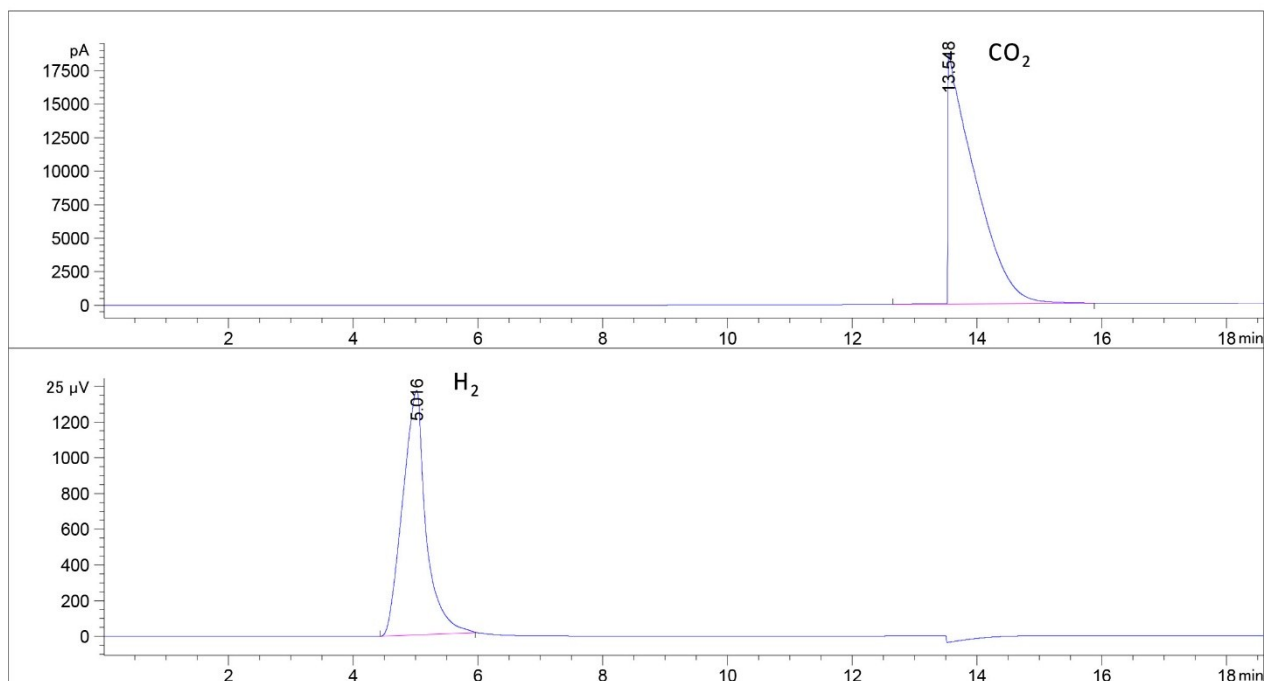

Table 2 GC chromatogram for compound **6** (Table 1); reaction conditions: 65°C, 4 M FA in water; catalyst (12 μmol) was incubated for 3 h at 65°C; then gas collection was performed over 3 h; detection limit for CO: 15 ppm

#### Referneces:

1. J. D. Blakemore, N. D. Schley, D. Balcells, J. F. Hull, G. W. Olack, C. D. Incarvito, O. Eisenstein, G. W. Brudvig and R. H. Crabtree, *J. Am. Chem. Soc.*, 2010, **132**, 16017-16029.
2. G. W. Karpin, D. M. Morris, M. T. Ngo, J. S. Merola and J. O. Falkinham Iii, *MedChemComm*, 2015, **6**, 1471-1478.
